# Supplementary material for: CARD9 negatively regulates NLRP3-induced IL-1β production on Salmonella infection of macrophages
Source: PubMed Central journal article supplement (PMC5052644; doi:10.1038/ncomms12874), 2016-09-27
Supplement: ncomms12874-s1.pdf [file ncomms12874-s1.pdf]

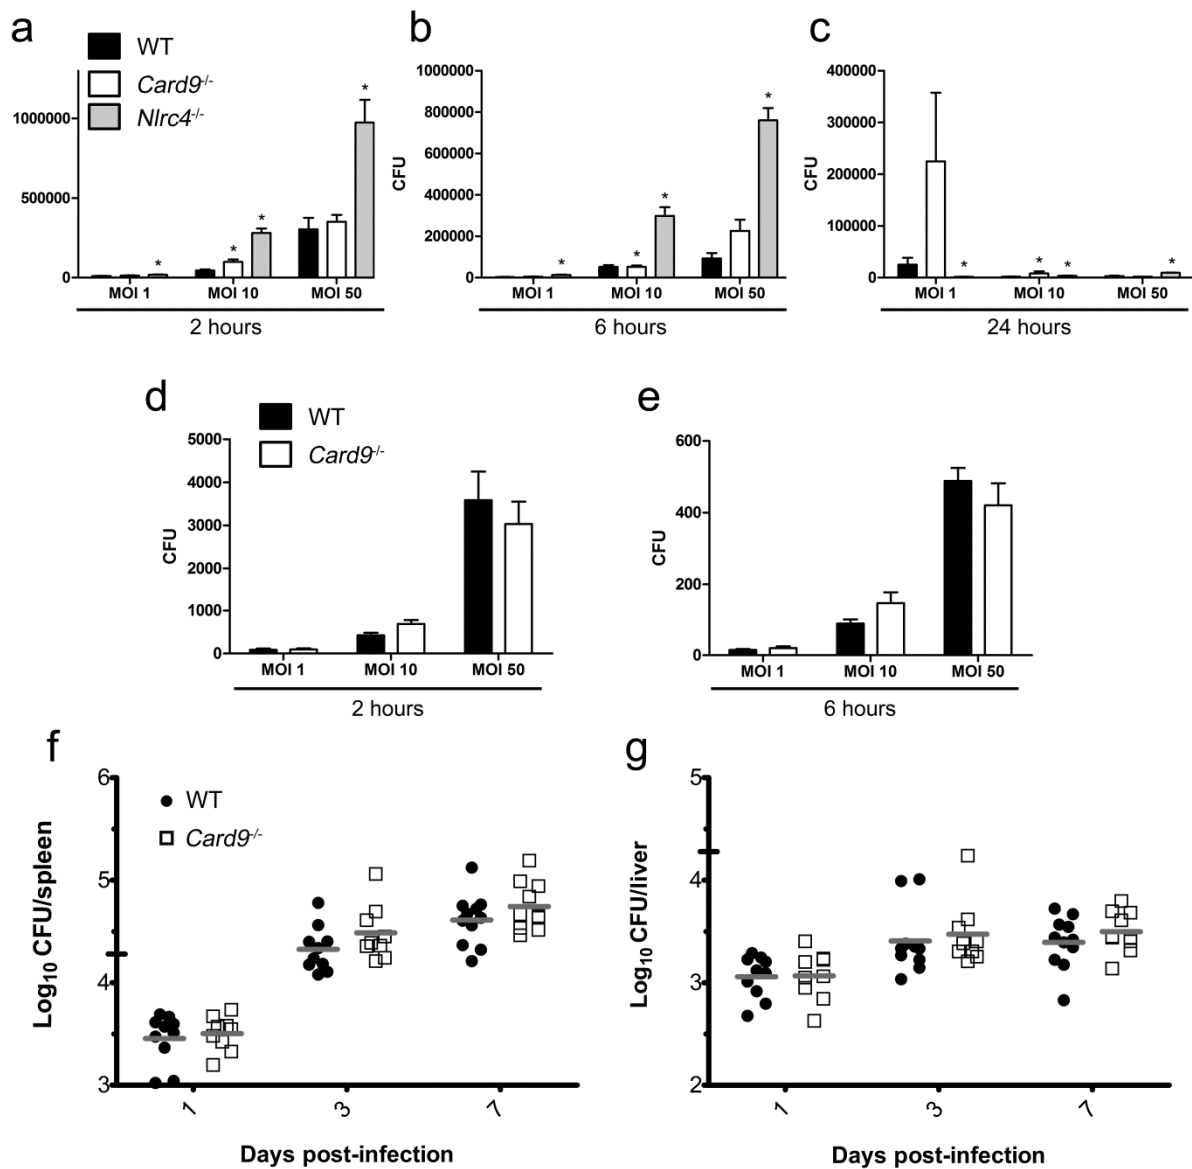

**Supplementary Figure 1: CARD9 does not influence bacteria counts *in vitro* and *in vivo*.** (a-c) intracellular bacteria counts of WT, *Nlrc4*<sup>-/-</sup> and *Card9*<sup>-/-</sup> BMDMs after infection with *S. Typhimurium* SL1344 at MOIs 1, 10 and 50 for 2 (a), 6 (b) and 24 (c) hours. (g-h) Bacteria burden in the spleen (g) and liver (h) after C57BL/6 WT and *Card9*<sup>-/-</sup> infection with *S. Typhimurium* M525P ( $4 \times 10^3$  CFU). \*  $p < 0.05$  in comparison to WT (one-way ANOVA with Tukey's multiple comparisons test). (a-e) Data from two independent experiments (mean and s.e.m.). (g-h) Data from two independent experiments using from four to six mice per genotype, plus two negative controls per genotype. Mice were from 8 to 16 weeks old, both male and female.

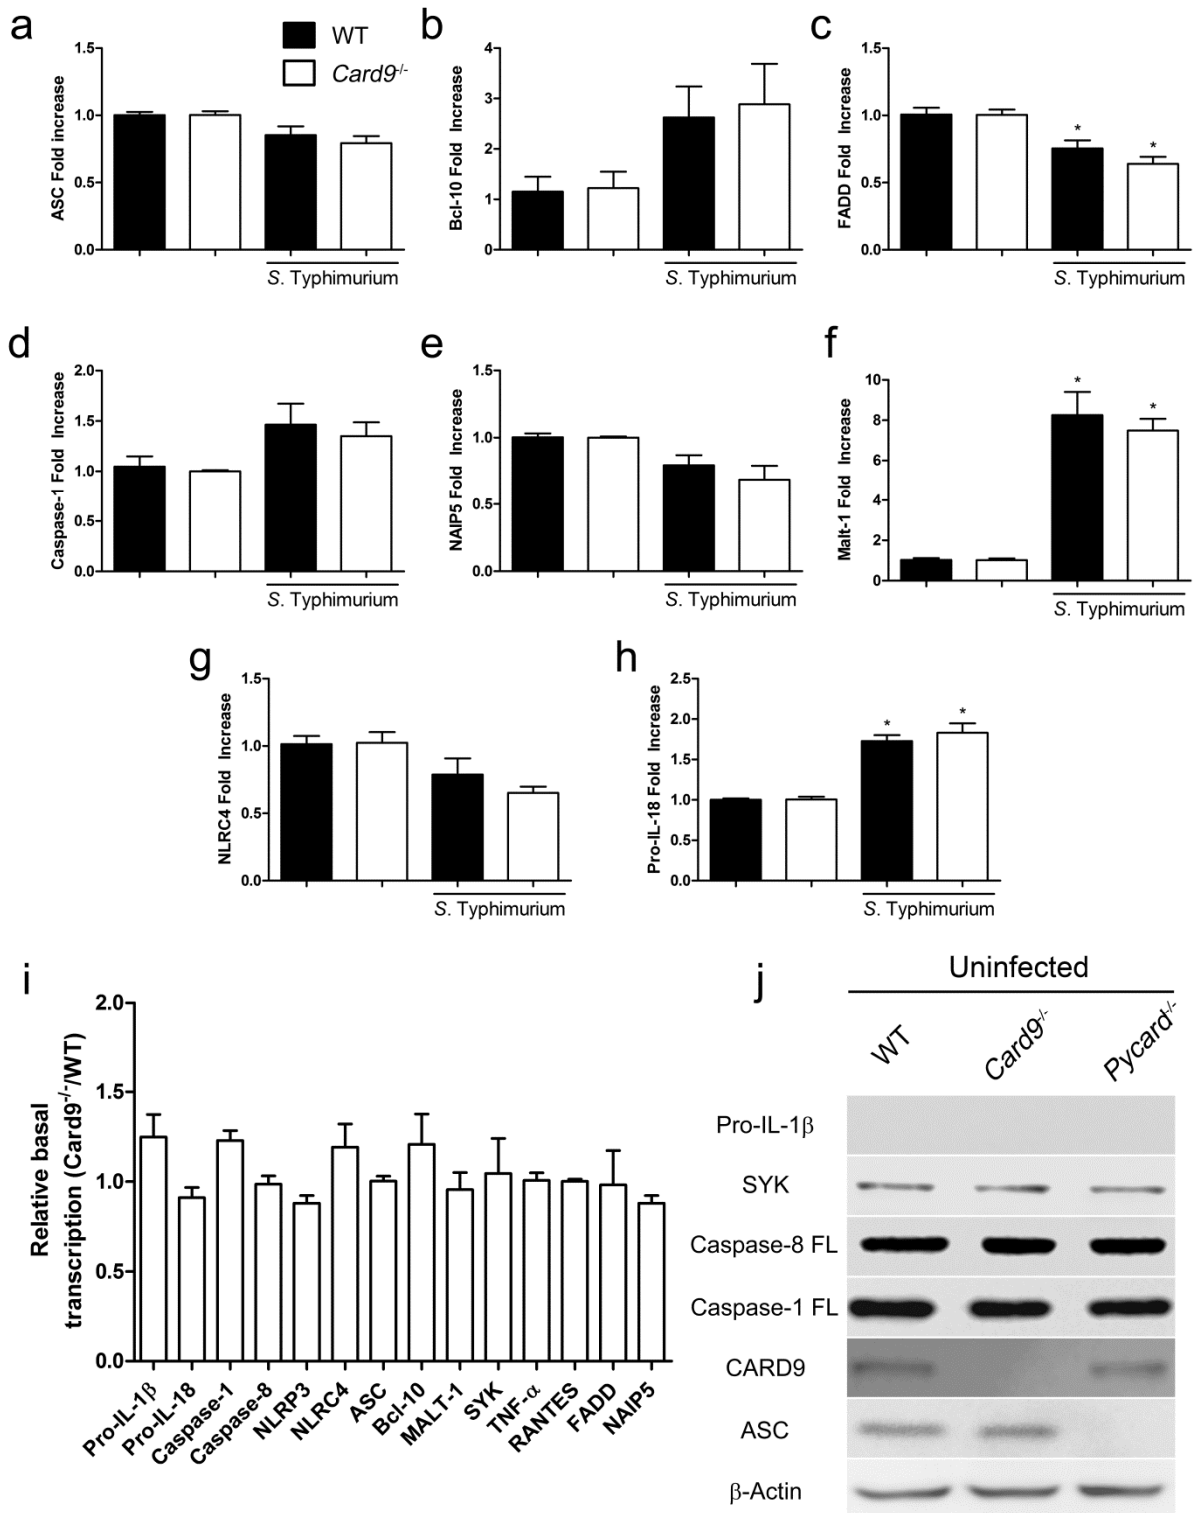

**Supplementary Figure 2: Transcription and expression analysis of WT and *Card9*<sup>-/-</sup> BMDMs.** (a-h) qPCR analysis of WT and *Card9*<sup>-/-</sup> BMDMs infected with *S. Typhimurium* (MOI 5) for 2 hours, in relation to their respective uninfected controls. (a) ASC, (b) Bcl-10, (c) FADD, (d) Caspase-1, (e) NAIIP5, (f) Malt-1, (g) NLRC4, (h) pro-IL-18. (i) Basal transcriptional levels in uninfected *Card9*<sup>-/-</sup> BMDMs in relation to uninfected WT cells. (j) Basal expression of pro-IL-1 $\beta$ , SYK, Caspase-8 Full Length, Caspase-1 Full Length, CARD9, ASC,  $\beta$ -actin in WT, *Card9*<sup>-/-</sup> and *Pycard*<sup>-/-</sup> BMDMs cell lysates. \*  $p < 0.05$  in

comparison to uninfected control (one-way ANOVA with Tukey's multiple comparisons test). (a-i) Data from three independent experiments (mean and s.e.m.). (j) Image is representative of three independent experiments.

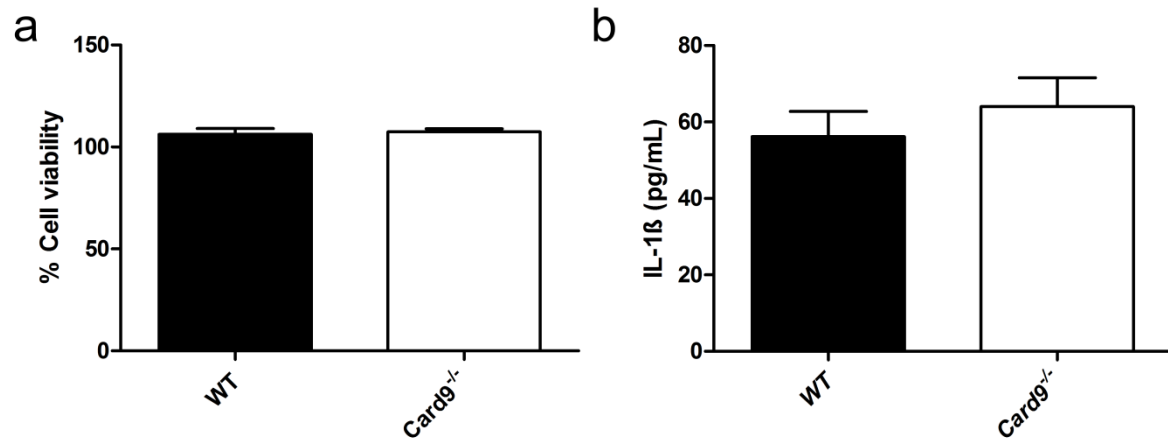

**Supplementary Figure 3: CARD9 does not control IL-1 $\beta$  produced via AIM2.** (a) Cellular viability and (b) IL-1 $\beta$  from LPS-primed BMDMs after transfection with poly(dA:dT) for 4 hours. Data from three independent experiments (mean and s.e.m.).

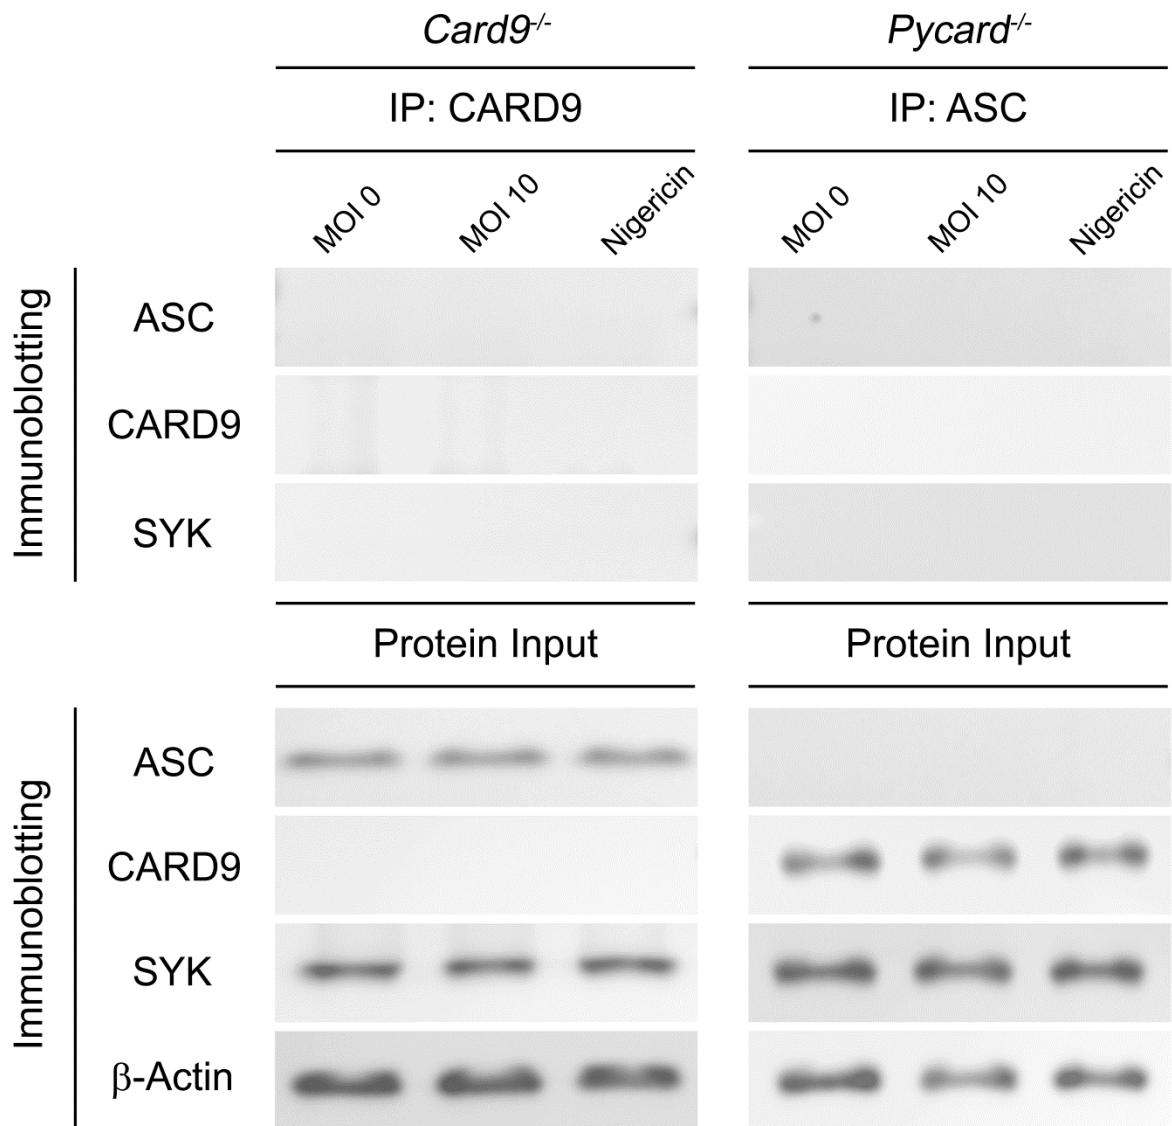

**Supplementary Figure 4: CARD9 and ASC co-IPs isotype controls.** *Card9<sup>-/-</sup>* and *Pycard<sup>-/-</sup>* BMDMs were primed with LPS (200 ng/mL) for 3 hours and incubated with *S. Typhimurium* (MOI 10, 30 minutes) or with Nigericin (10 μM, 30 minutes). IPs were then performed as indicated using anti-CARD9 (for *Card9<sup>-/-</sup>* BMDMs) or anti-ASC (for *Pycard<sup>-/-</sup>* BMDMs), followed by immunoblotting. No IPs or co-IPs are observed. Images are representative of three independent experiments.

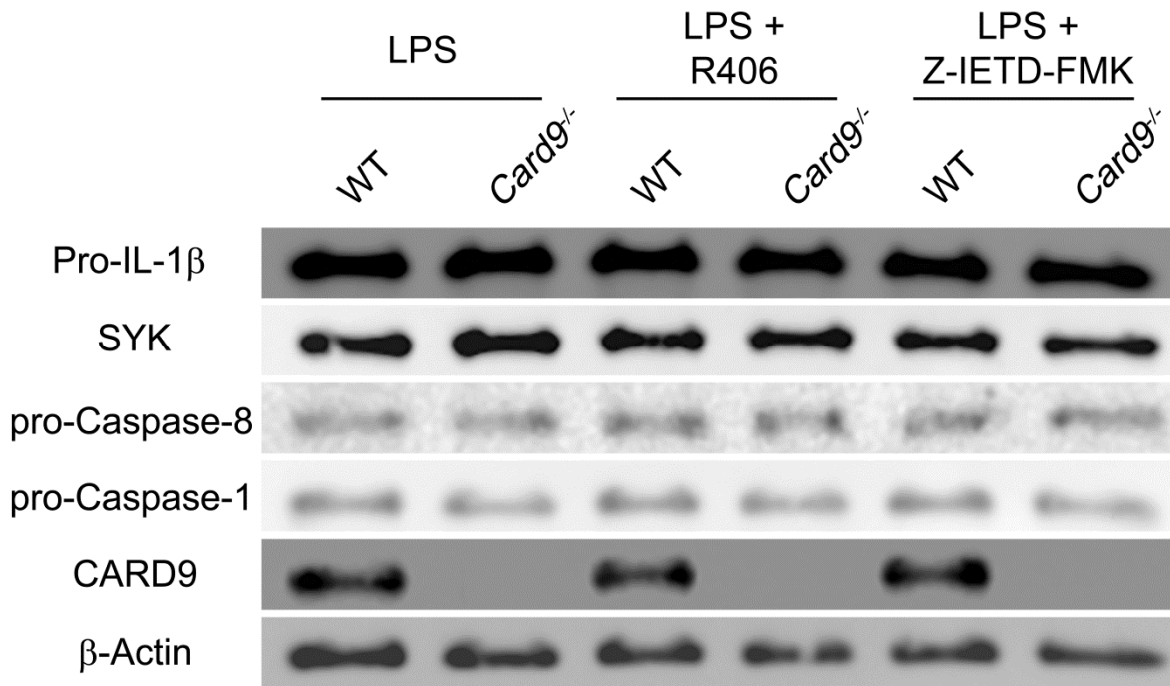

**Supplementary Figure 5: LPS-priming by itself or use of Z-IETD-FMK and R406 do not cause different expression in WT and *Card9*<sup>-/-</sup> BMDMs.** Expression of pro-IL-1β, SYK, pro-caspase-8, pro-caspase-1, CARD9, β-actin in of cell lysates from WT and *Card9*<sup>-/-</sup> BMDMs incubated for 3 hours with LPS (200 ng/mL) or 3 hours with LPS with and additional hour of incubation with Z-IETD-FMK (10 μM) or R406 (1 μM). Figure is representative of three independent experiments.

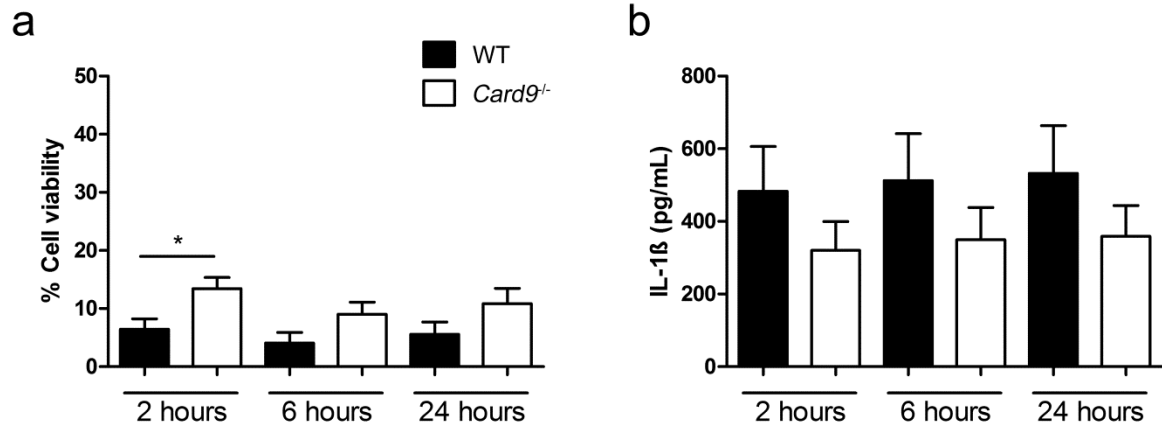

**Supplementary Figure 6: CARD9 plays no role in controlling IL-1 $\beta$  production in BMDCs.** (a) cellular viability (as measured by LDH release) and (b) IL-1 $\beta$  secretion (as measured by ELISA), of WT and *Card9*<sup>-/-</sup> BMDCs after infection with *S. Typhimurium* SL1344 at MOI 10 for 2, 6 and 24 hours. (a-b) Data from three independent experiments (mean and s.e.m.).

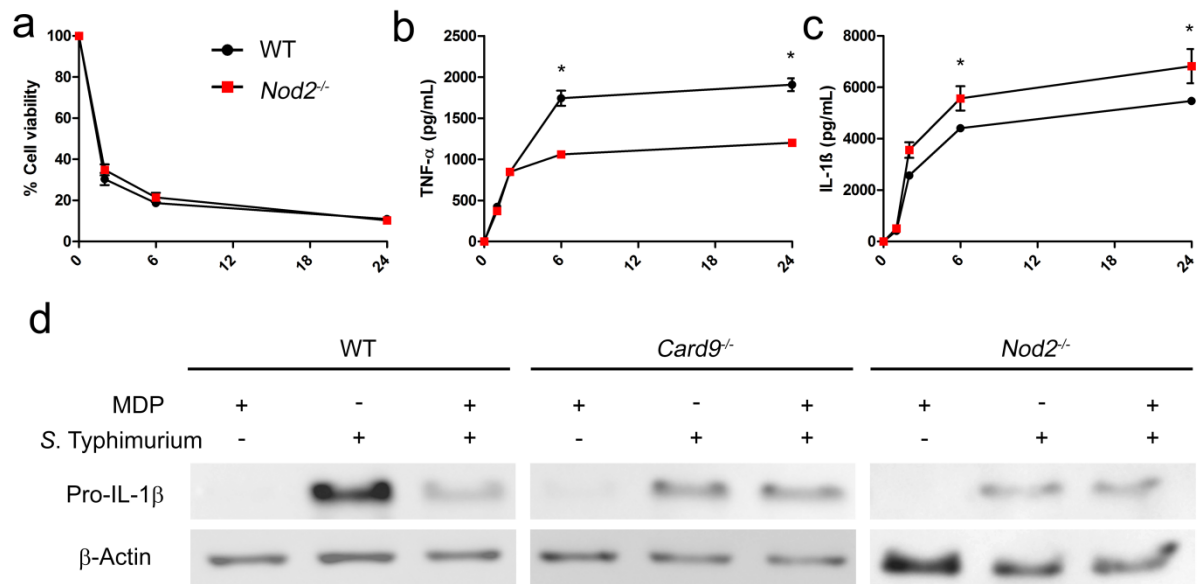

**Supplementary Figure 7: NOD2 up- and down-regulates the expression of different cytokines during *S. Typhimurium* infection.** (a) Cellular viability (as measured by LDH release) (b) IL-1 $\beta$  secretion (as measured by ELISA) and (c) TNF- $\alpha$  (as measured by ELISA) of WT and *Nod2*<sup>-/-</sup> BMDMs after infection with *S. Typhimurium* SL1344 at MOI 10 for 2, 6 and 24 hours. (d) Pro-IL-1 $\beta$  expression in WT, *Nod2*<sup>-/-</sup> and *Card9*<sup>-/-</sup> BMDMs infected with *S. Typhimurium* (MOI 10) with or without MDP co-stimulation (10  $\mu$ g/mL) (a-c) Data from two independent experiments (mean and s.e.m.). (d) Figure is representative of three independent experiments. \*  $p < 0.05$  (two-way ANOVA) with Bonferroni post-test.



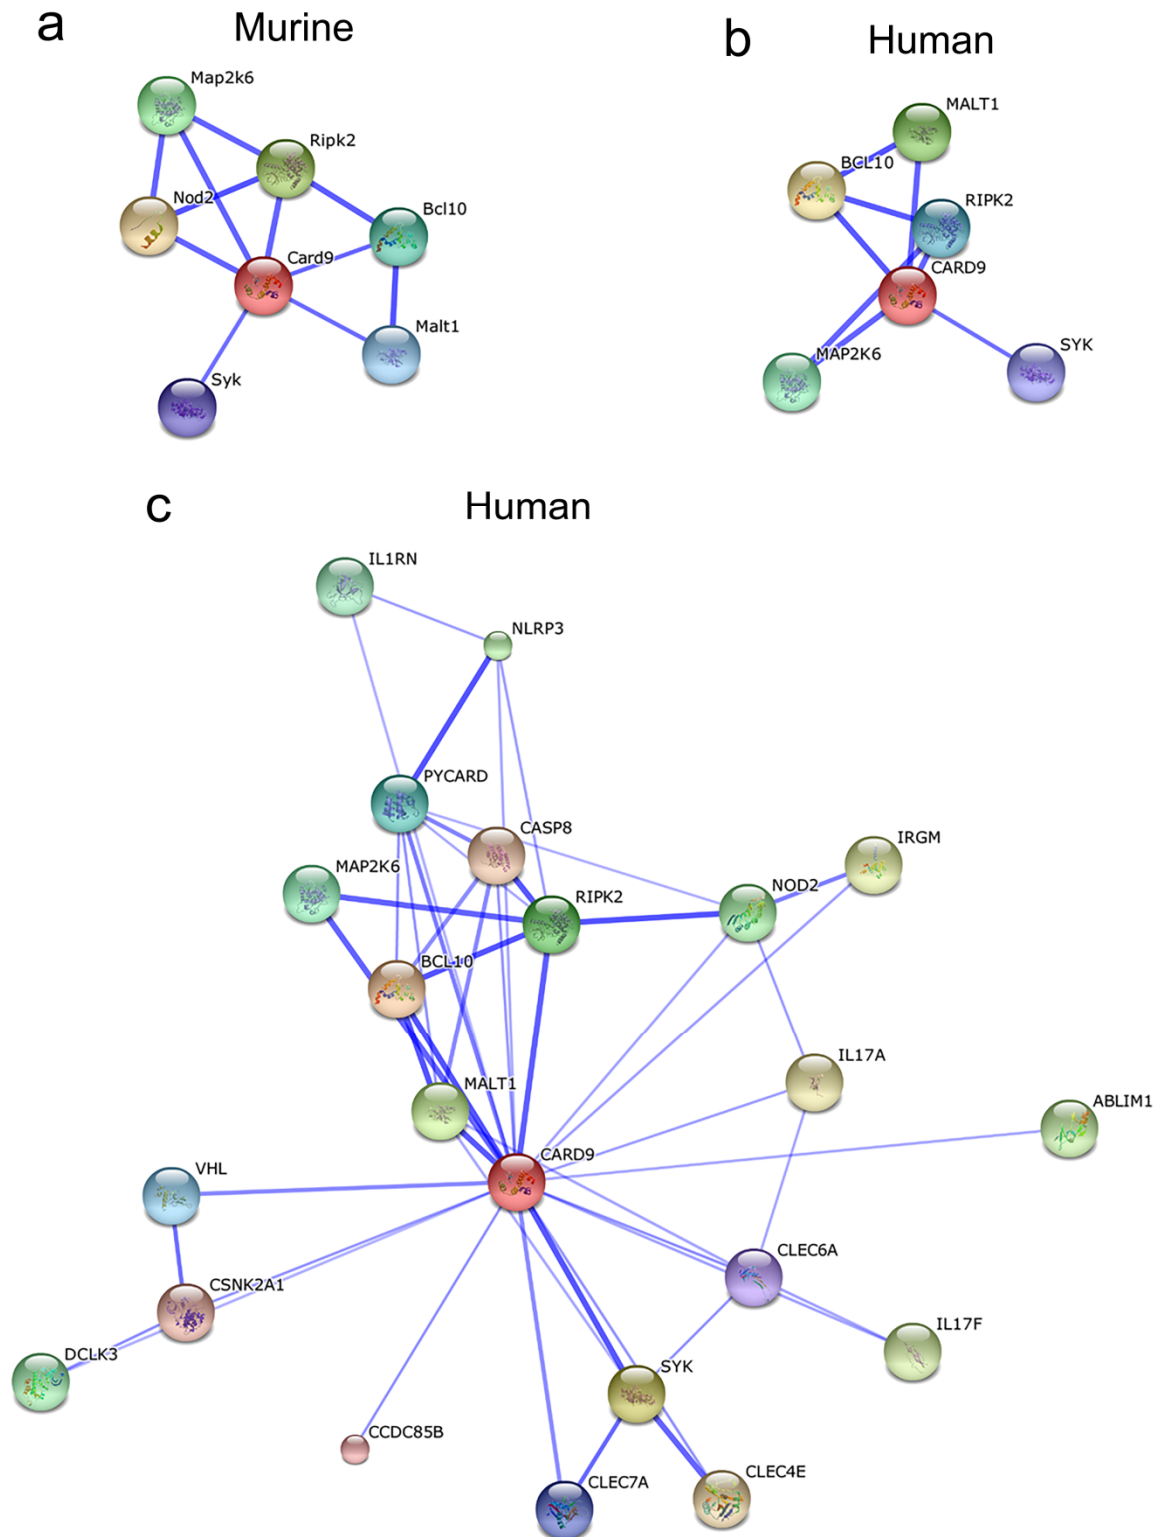

**Supplementary Figure 8: CARD9 interfaces with multiple inflammatory and death-related signalling pathways.** Functional association network analysis of the primary CARD9 interactome was performed using STRINGv10. High confidence interaction partners (score > 0.7) for murine (a) and human (b) CARD9. Reducing the stringency of the inclusion criteria to include medium confidence interaction partners (score > 0.4) confirms the expansive signalling network in which CARD9 is involved supporting its assignment as a critical inflammatory signalling node (c).

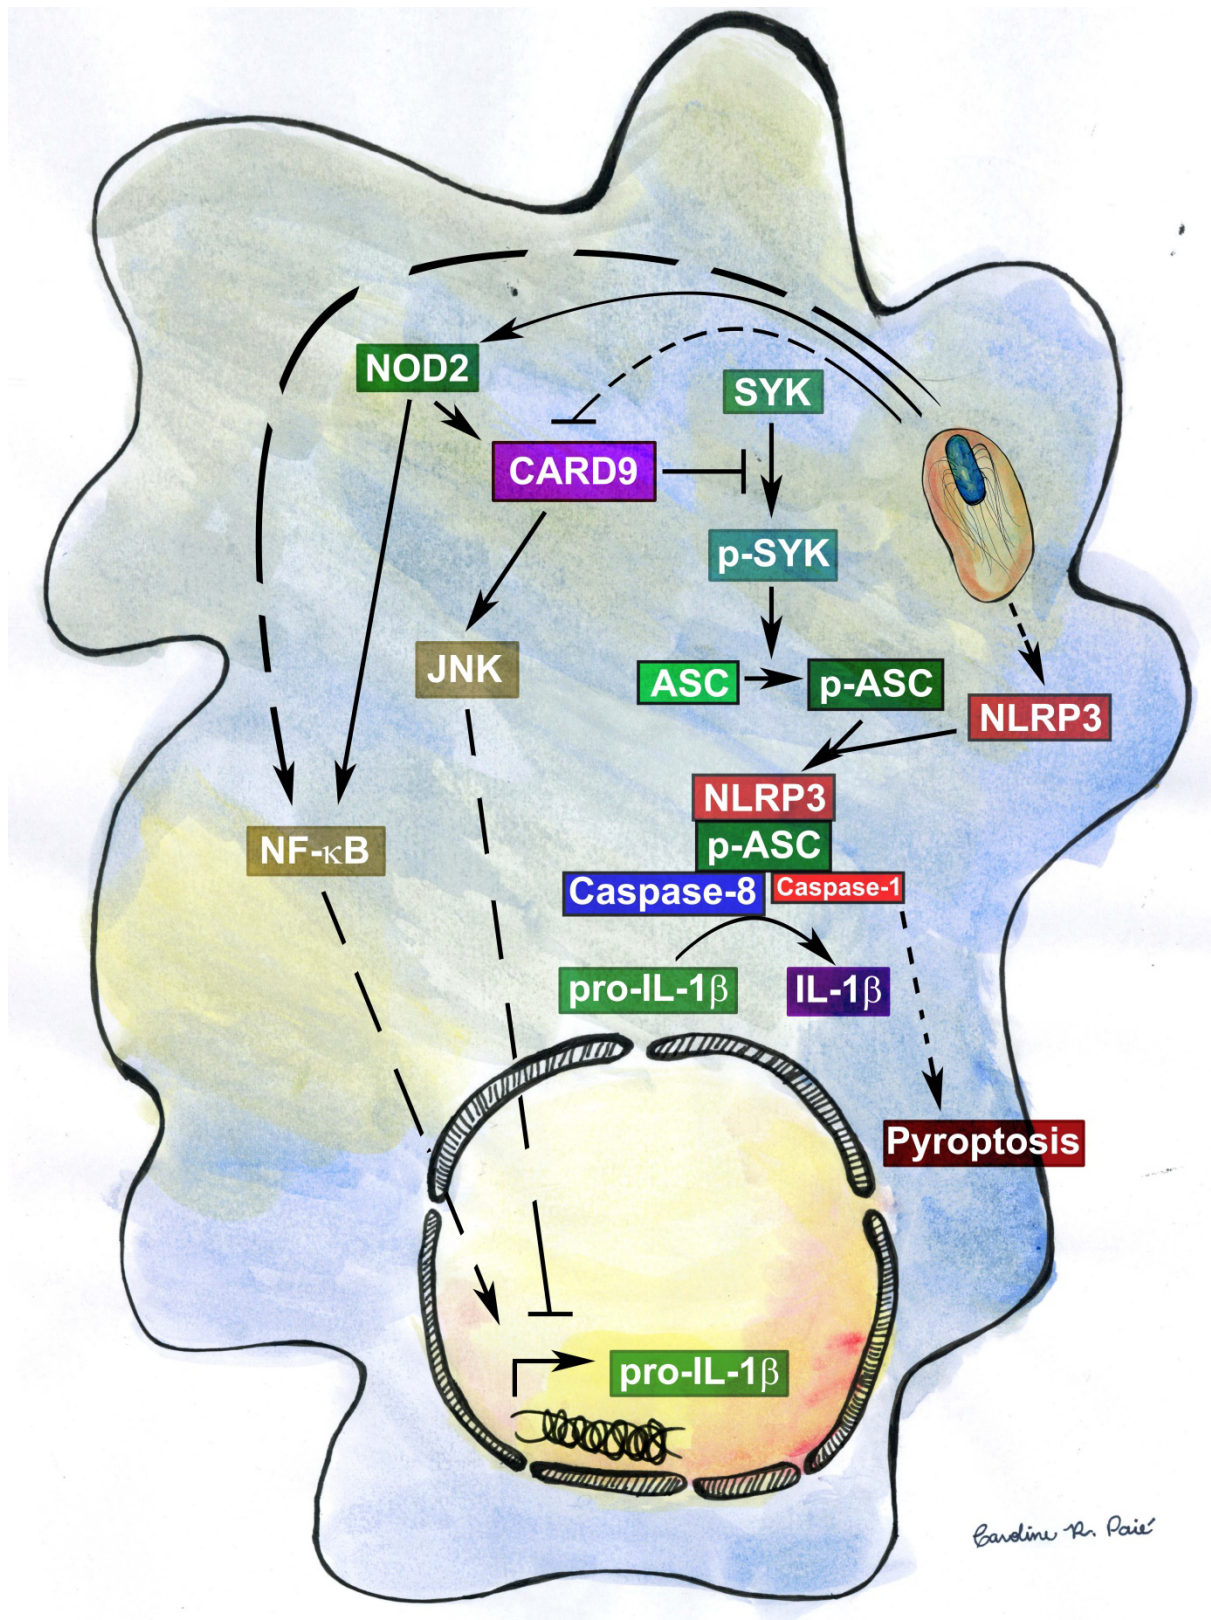

**Supplementary Figure 9: Simplified model for CARD9 regulation of IL-1 $\beta$  production.** Infection by *S. Typhimurium* triggers the assembly of the NLRP3 inflammasome in the cytoplasm of BMDMs with subsequent processing of pro-IL-1 $\beta$  to mature IL-1 $\beta$ . CARD9 negatively regulates inflammasome activity at two levels: suppressing pro-IL-1 $\beta$  expression and reducing caspase-8-dependent IL-1 $\beta$  processing.

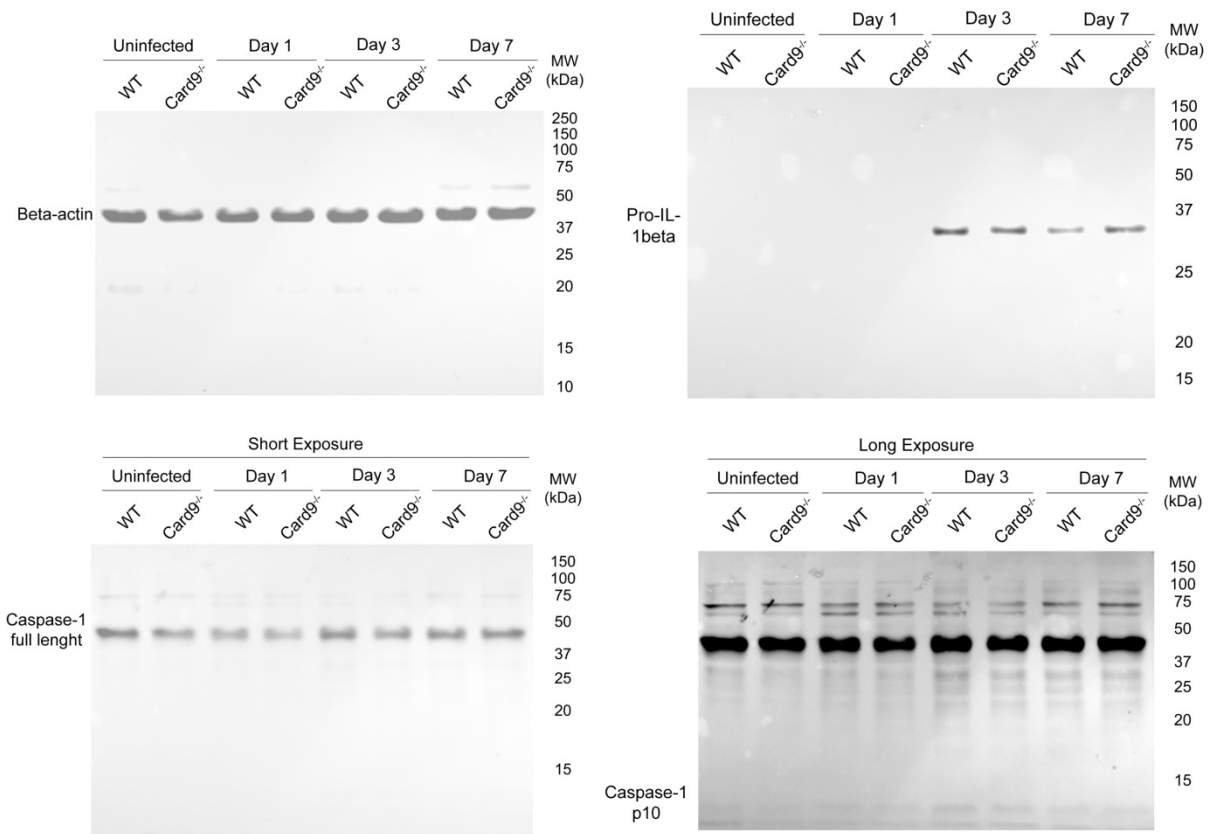

**Supplementary Figure 10: Uncropped immunoblots presented in Figure 1-p.** Membranes were probed using the antibody indicated ( $\beta$ -Actin, Pro-IL-1 $\beta$  and Caspase-1).

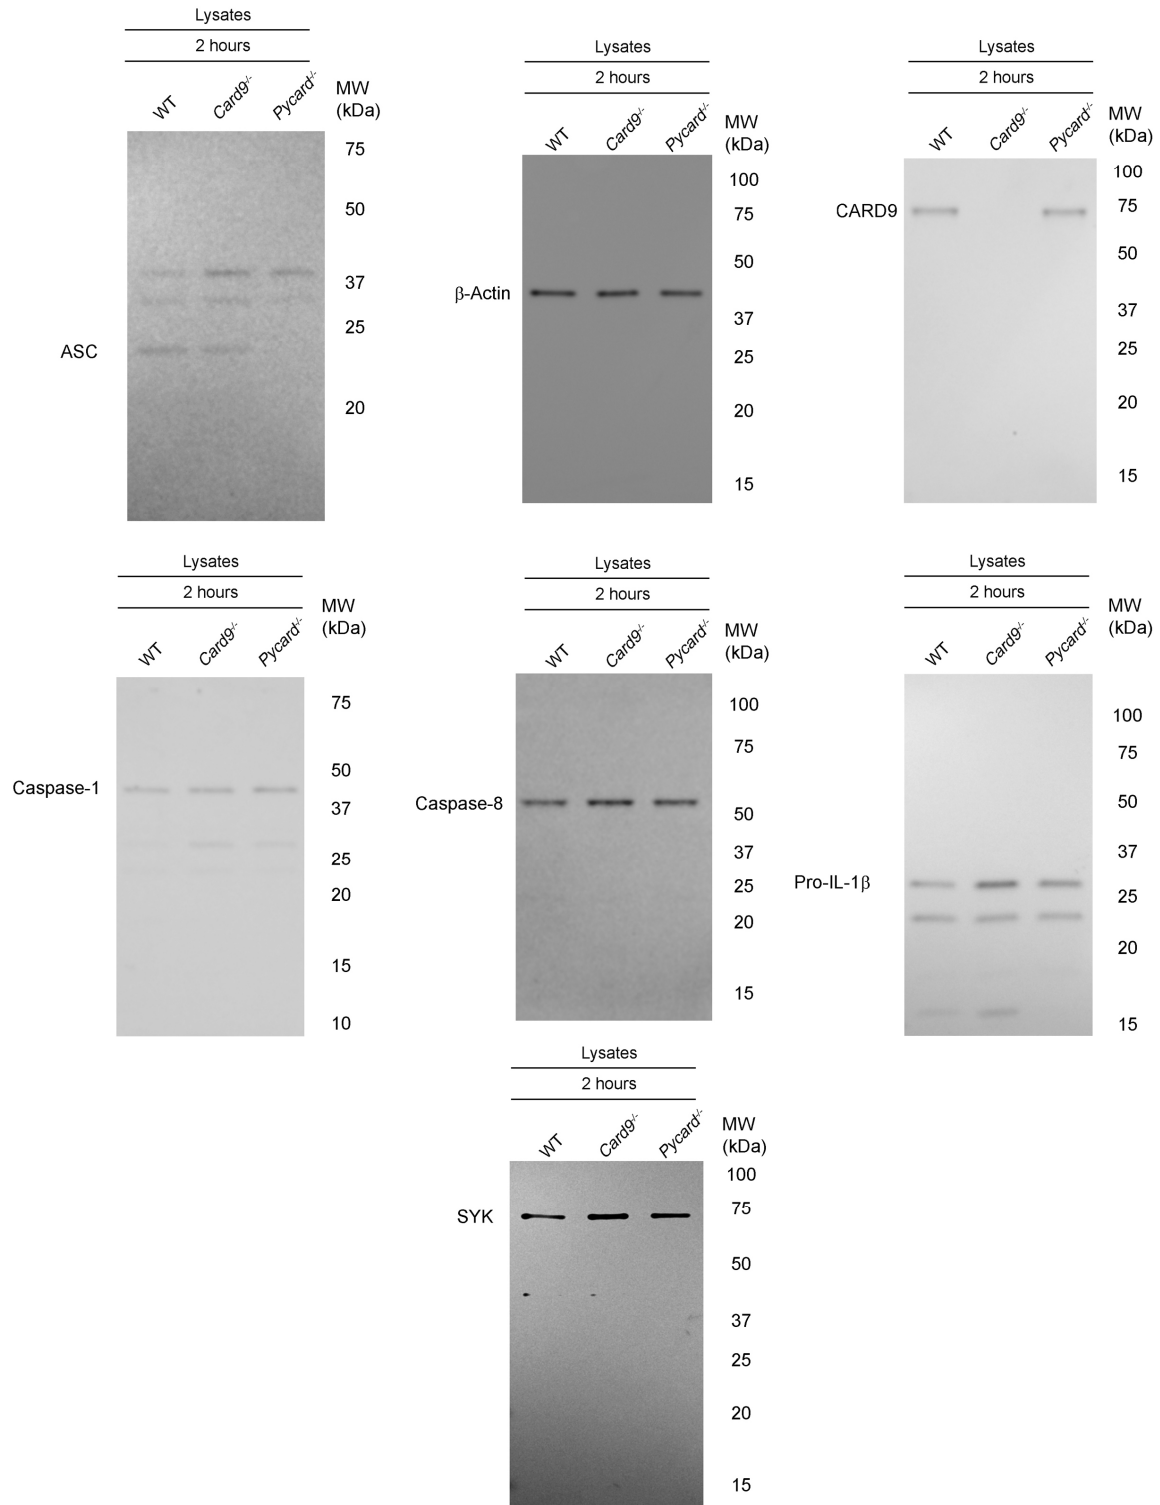

**Supplementary Figure 11: Uncropped immunoblots presented in Figure 2-g, Supernatants.** Membranes were probed using the antibody indicated (ASC,  $\beta$ -Actin, CARD9, Caspase-1, Caspase-8, Pro-IL-1 $\beta$  and SYK).



**Supplementary Figure 12: Uncropped immunoblots presented in Figure 2-g, Lysates after 2 hours infection.** Membranes were probed using the antibody indicated (ASC, β-Actin, CARD9, Caspase-1, Caspase-8, Pro-IL-1β and SYK).

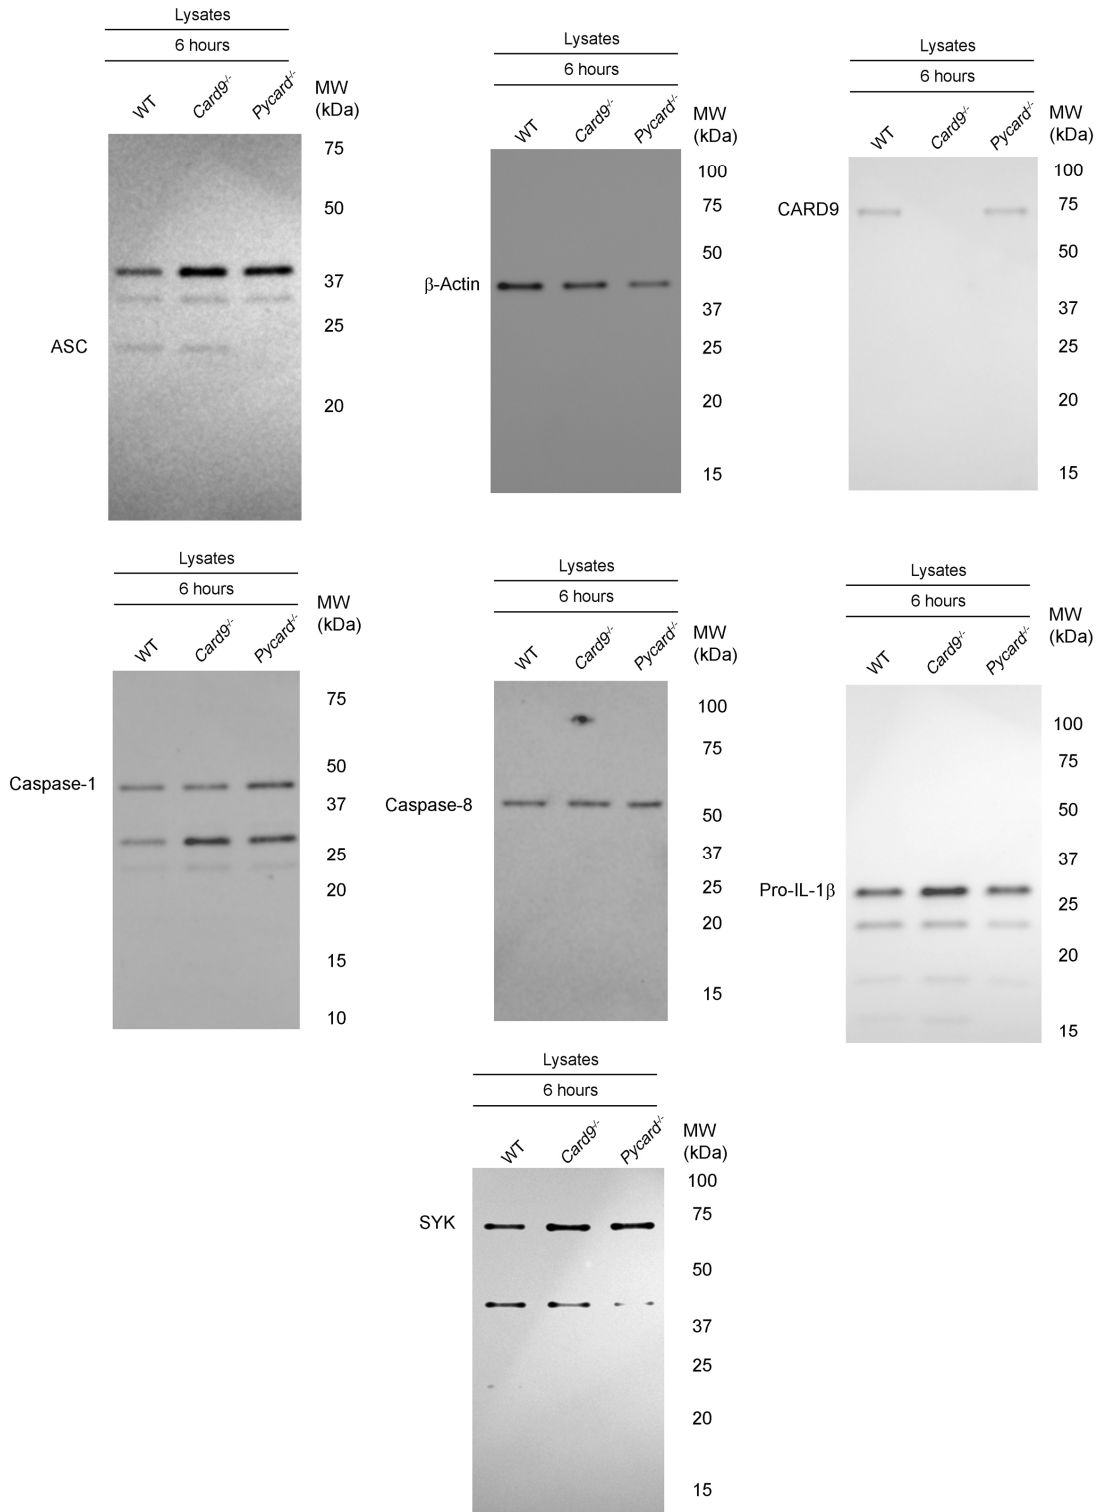

**Supplementary Figure 13: Uncropped immunoblots presented in Figure 2-g, Lysates after 6 hours infection.** Membranes were probed using the antibody indicated (ASC, β-Actin, CARD9, Caspase-1, Caspase-8, Pro-IL-1β and SYK).

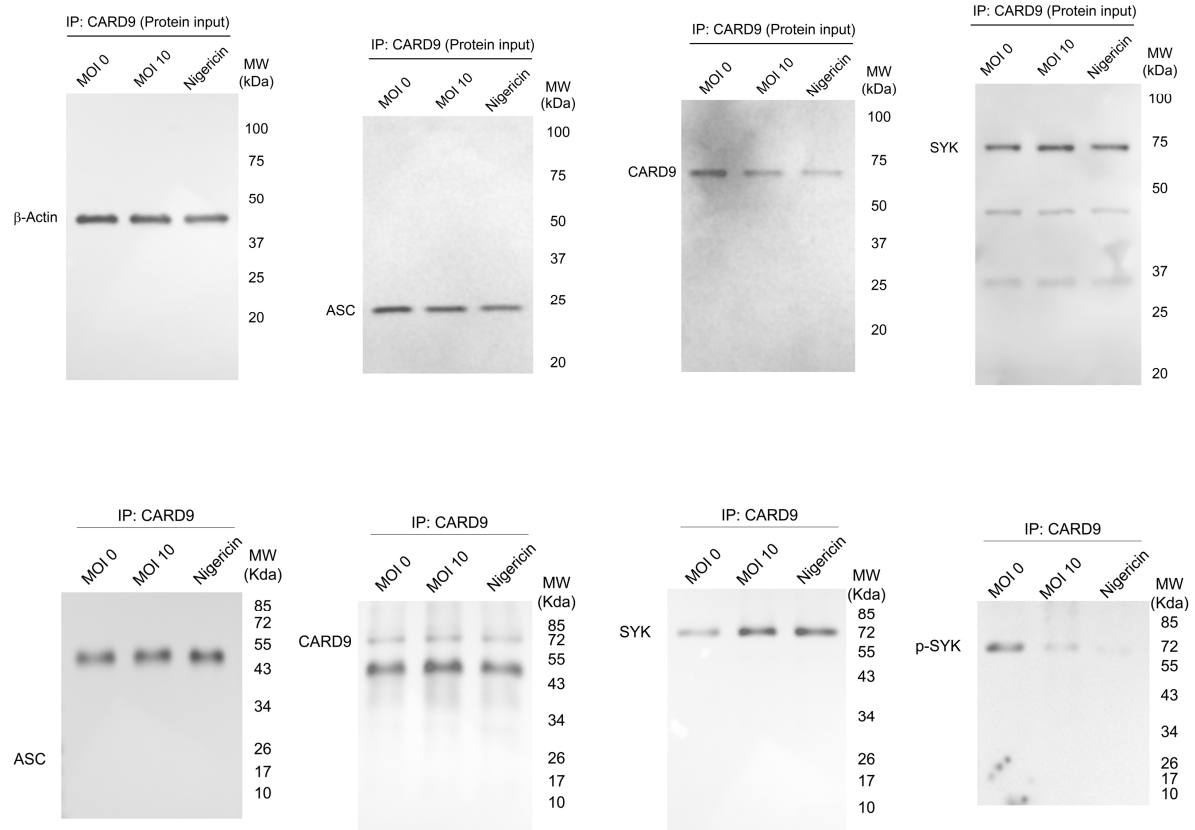

**Supplementary Figure 14: Uncropped immunoblots presented in Figure 5-b, CARD9 co-IPs.** Membranes were probed using the antibody indicated ( $\beta$ -Actin, ASC, CARD9, SYK and p-SYK).

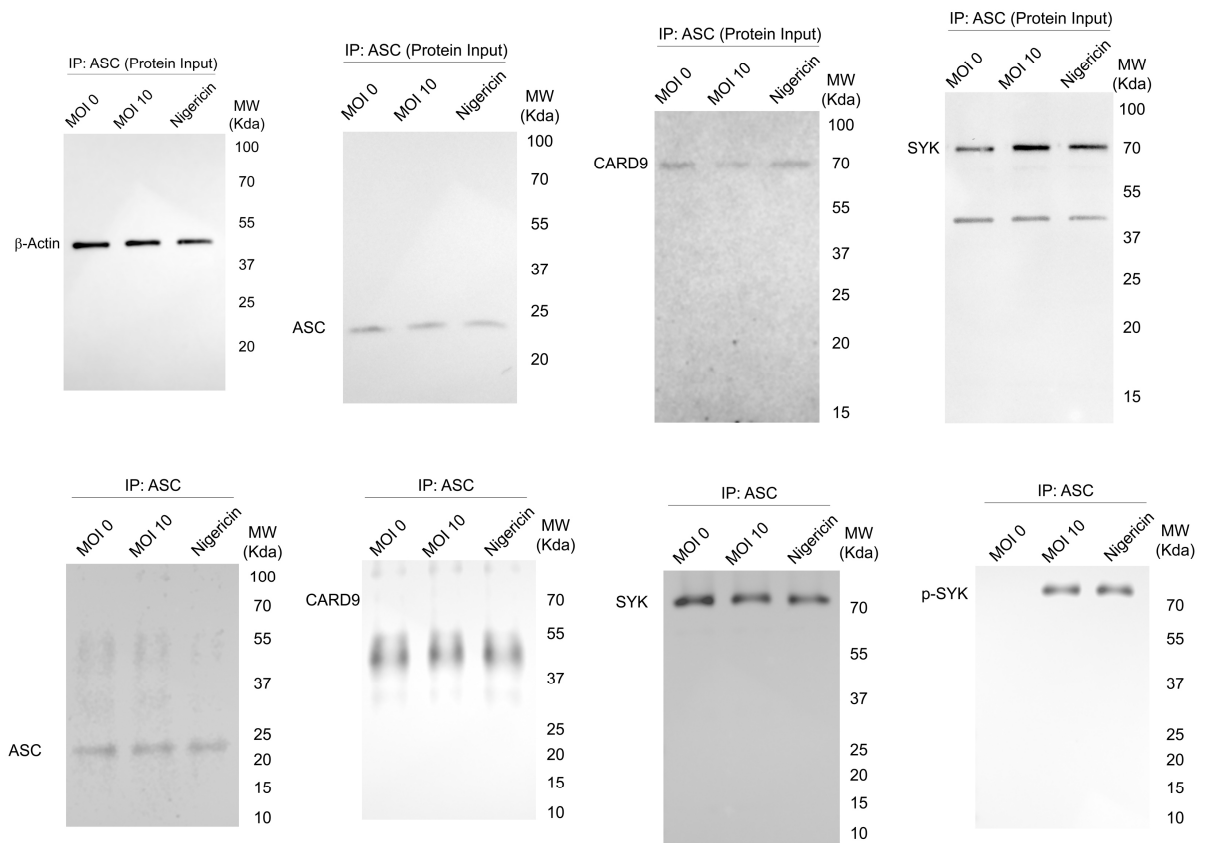

**Supplementary Figure 15: Uncropped immunoblots presented in Figure 5-b, ASC co-IPs.** Membranes were probed using the antibody indicated ( $\beta$ -Actin, ASC, CARD9, SYK and p-SYK).



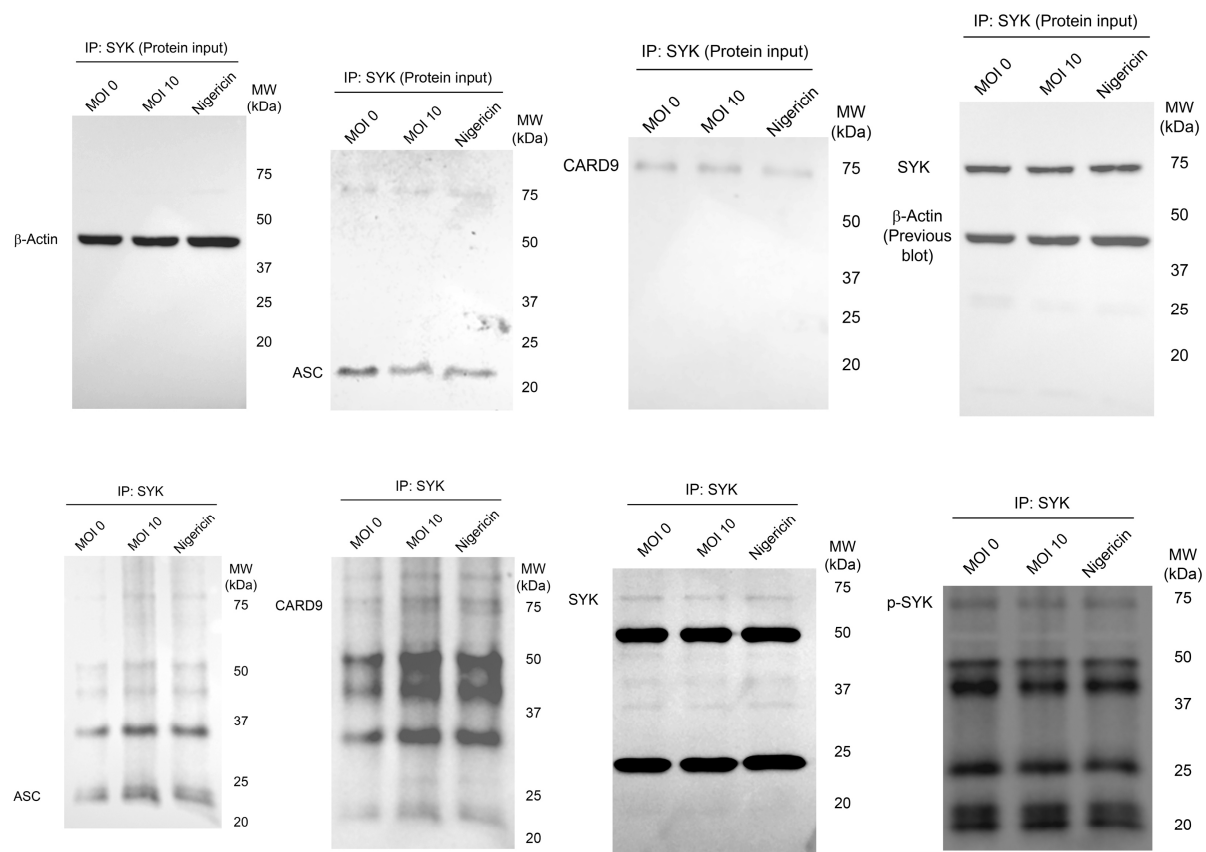

**Supplementary Figure 16: Uncropped immunoblots presented in Figure 5-b, SYK co-IPs.** Membranes were probed using the antibody indicated ( $\beta$ -Actin, ASC, CARD9, SYK and p-SYK).

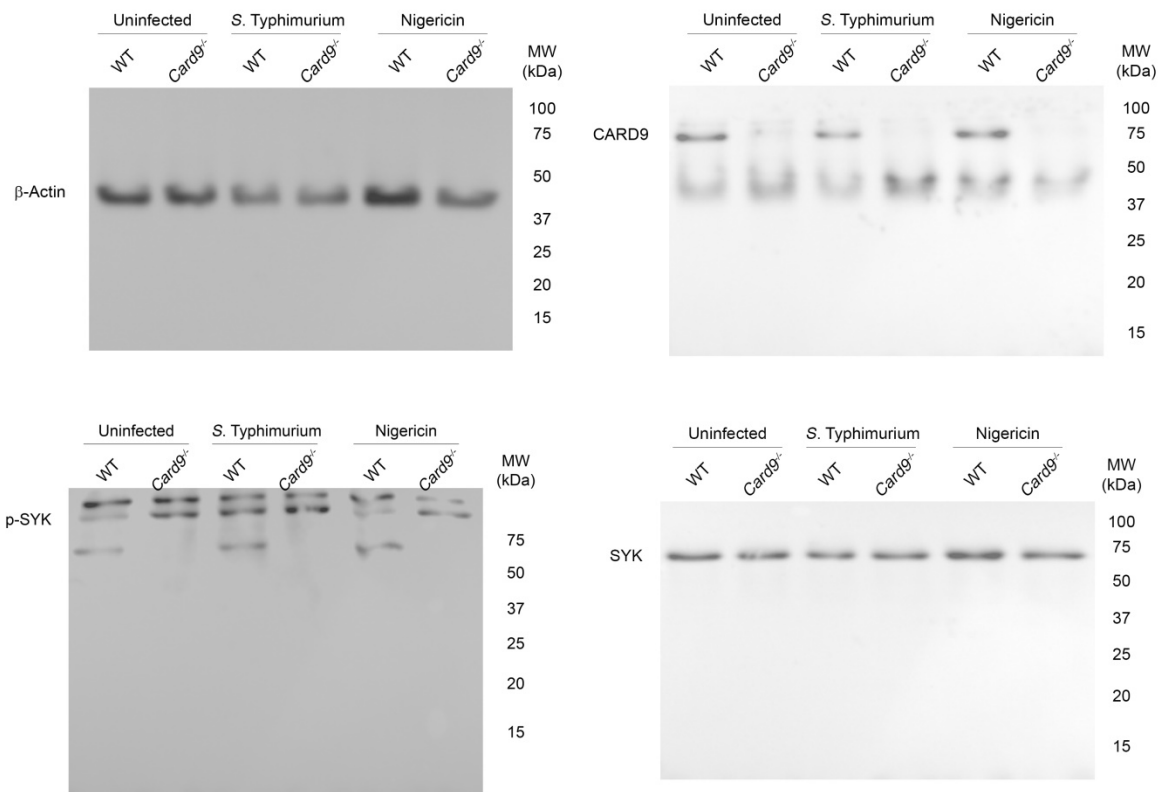

**Supplementary Figure 17: Uncropped immunoblots presented in Figure 5-c.** Membranes were probed using the antibody indicated ( $\beta$ -Actin, CARD9, SYK and p-SYK).

Fig. 8A

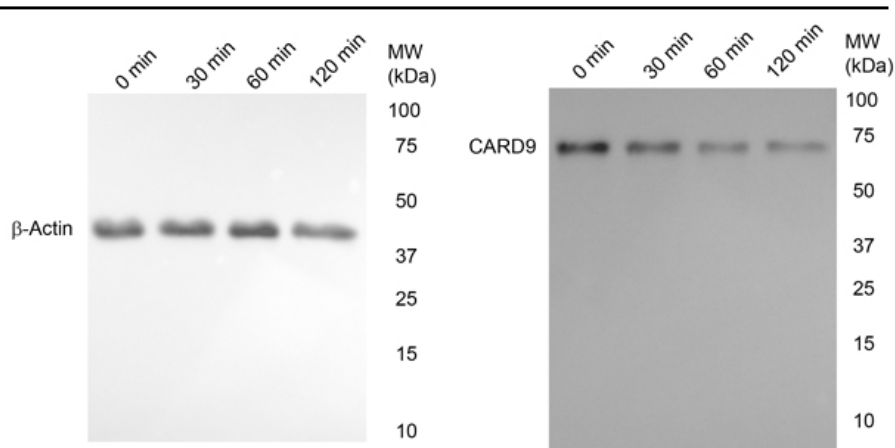

Fig. 8B

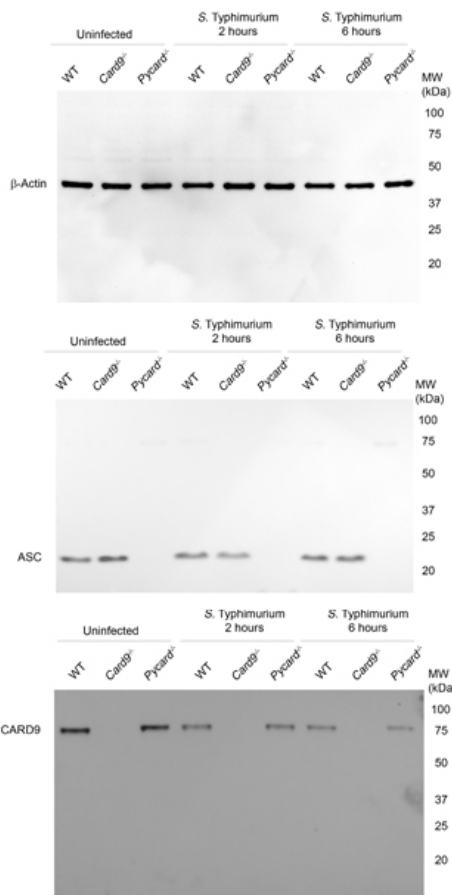

Fig. 8C

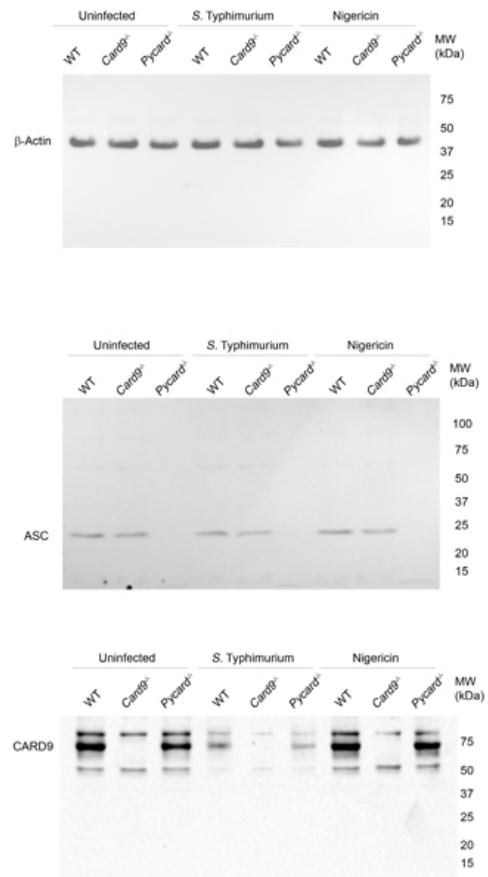

**Supplementary Figure 18: Uncropped immunoblots presented in Figure 8.** Membranes were probed using the antibody indicated ( $\beta$ -Actin, ASC, CARD9).

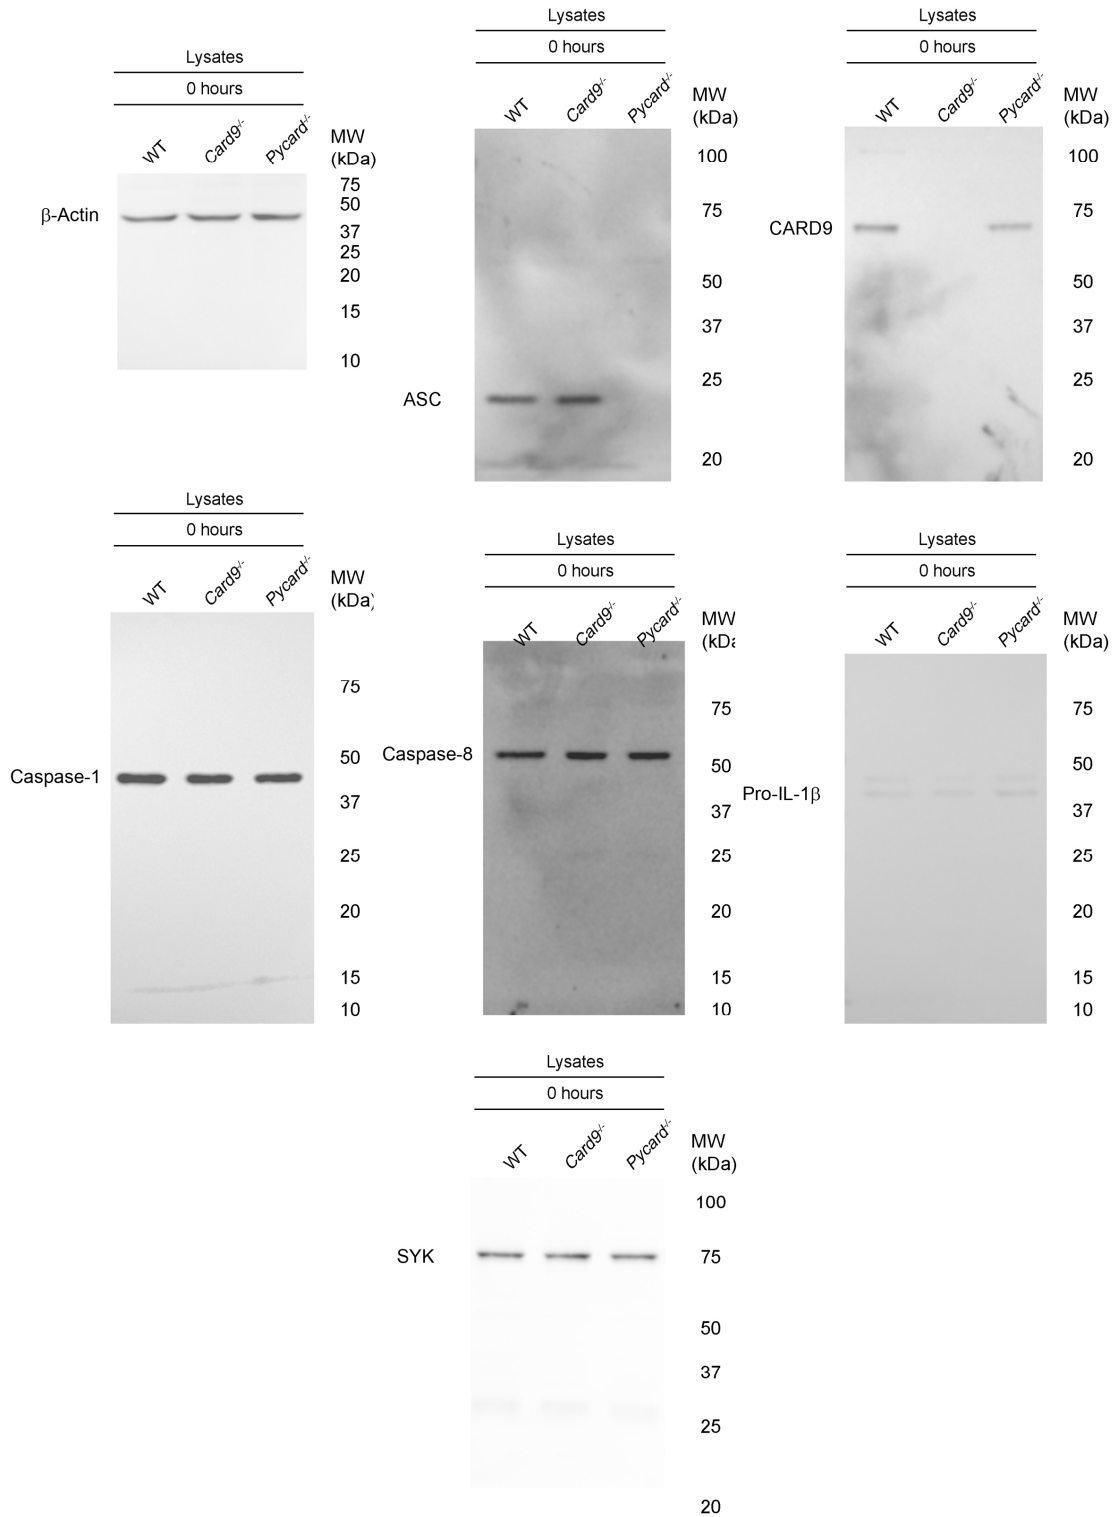

**Supplementary Figure 19: Uncropped immunoblots presented in Supplementary Figure 2-j, Uninfected cell lysates.** Membranes were probed using the antibody indicated (ASC, β-Actin, CARD9, Caspase-1, Caspase-8, Pro-IL-1β and SYK).

## CARD9 IP in *Card9*<sup>-/-</sup> BMDMs

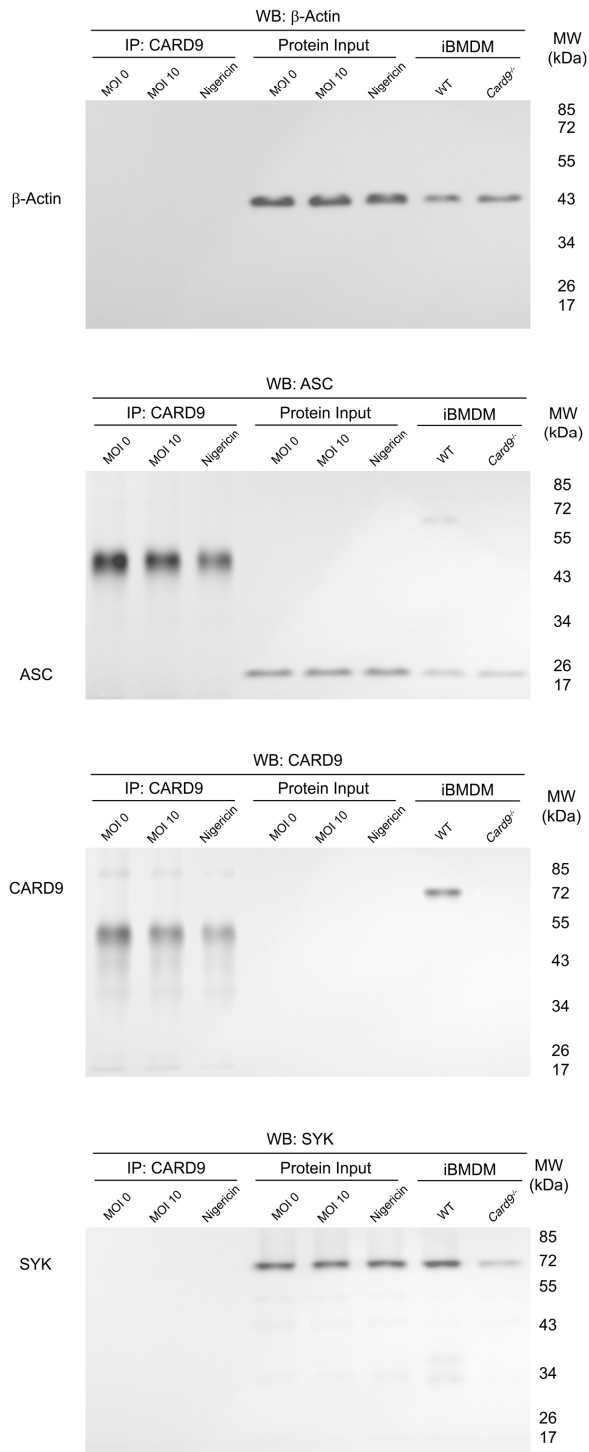

## ASC IP in *Pycard*<sup>-/-</sup> BMDMs

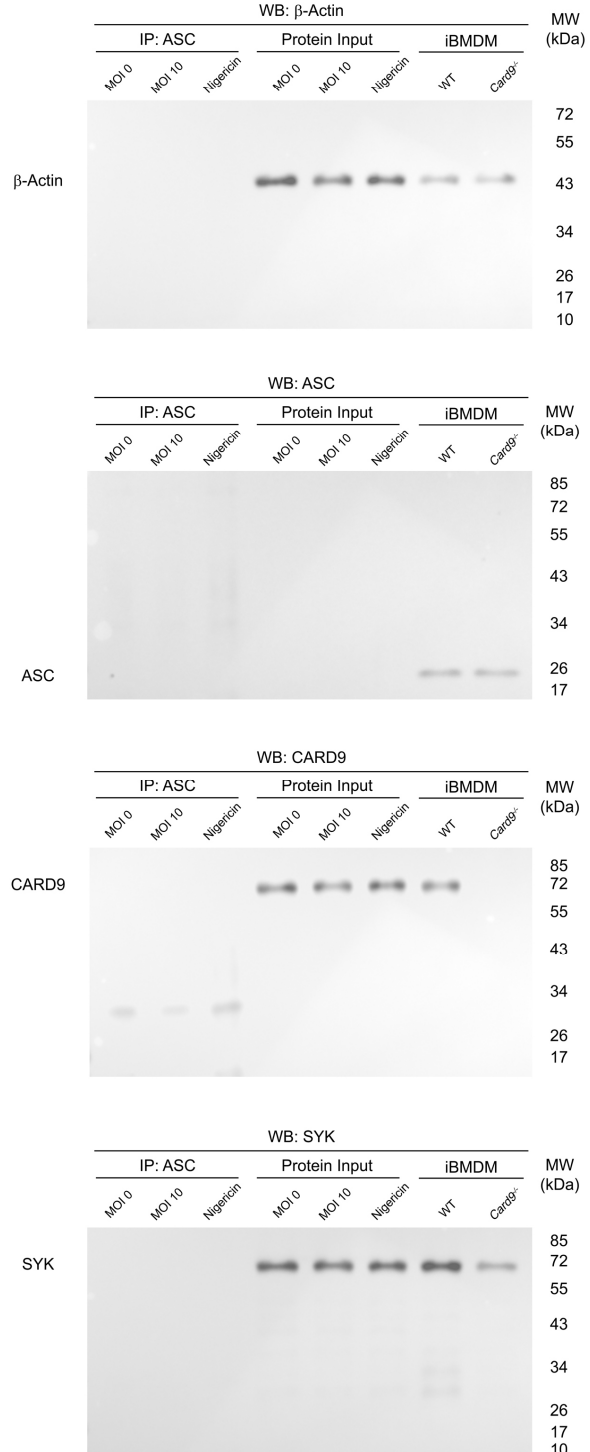

**Supplementary Figure 20: Uncropped immunoblots presented in Supplementary Figure 4, IP isotype control.** Membranes were probed using the antibody (ASC,  $\beta$ -Actin, CARD9 and SYK). WT and *Card9*<sup>-/-</sup> iBMDMs cells were used as additional controls.

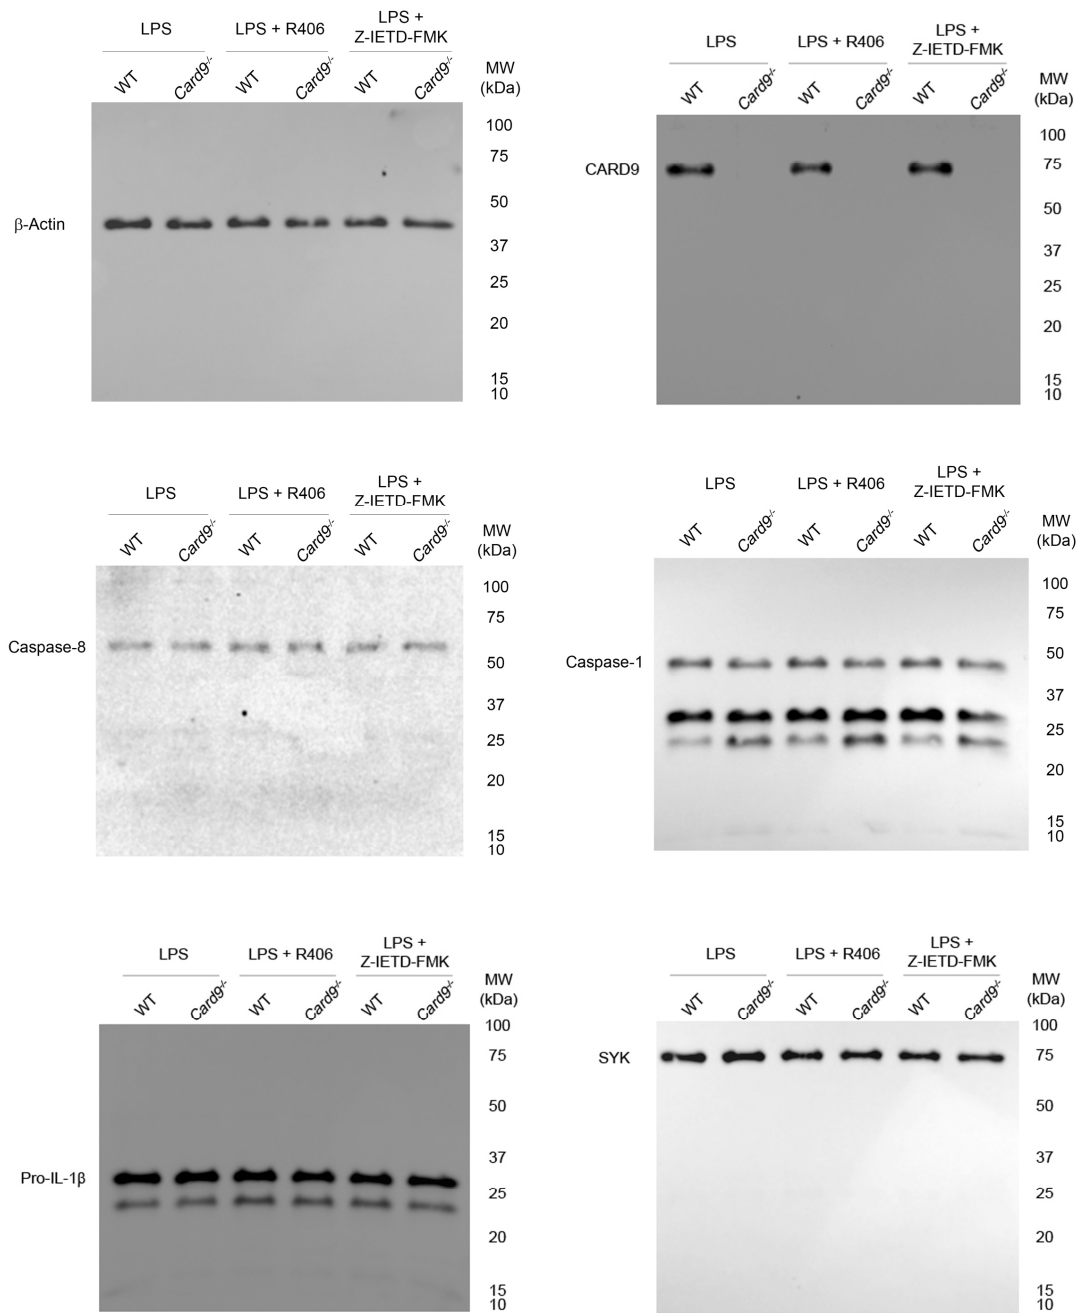

**Supplementary Figure 21: Uncropped immunoblots presented in Supplementary Figure 5.** Membranes were probed using the antibody indicated ( $\beta$ -Actin, CARD9, Caspase-1, Caspase-8, Pro-IL-1 $\beta$  and SYK).

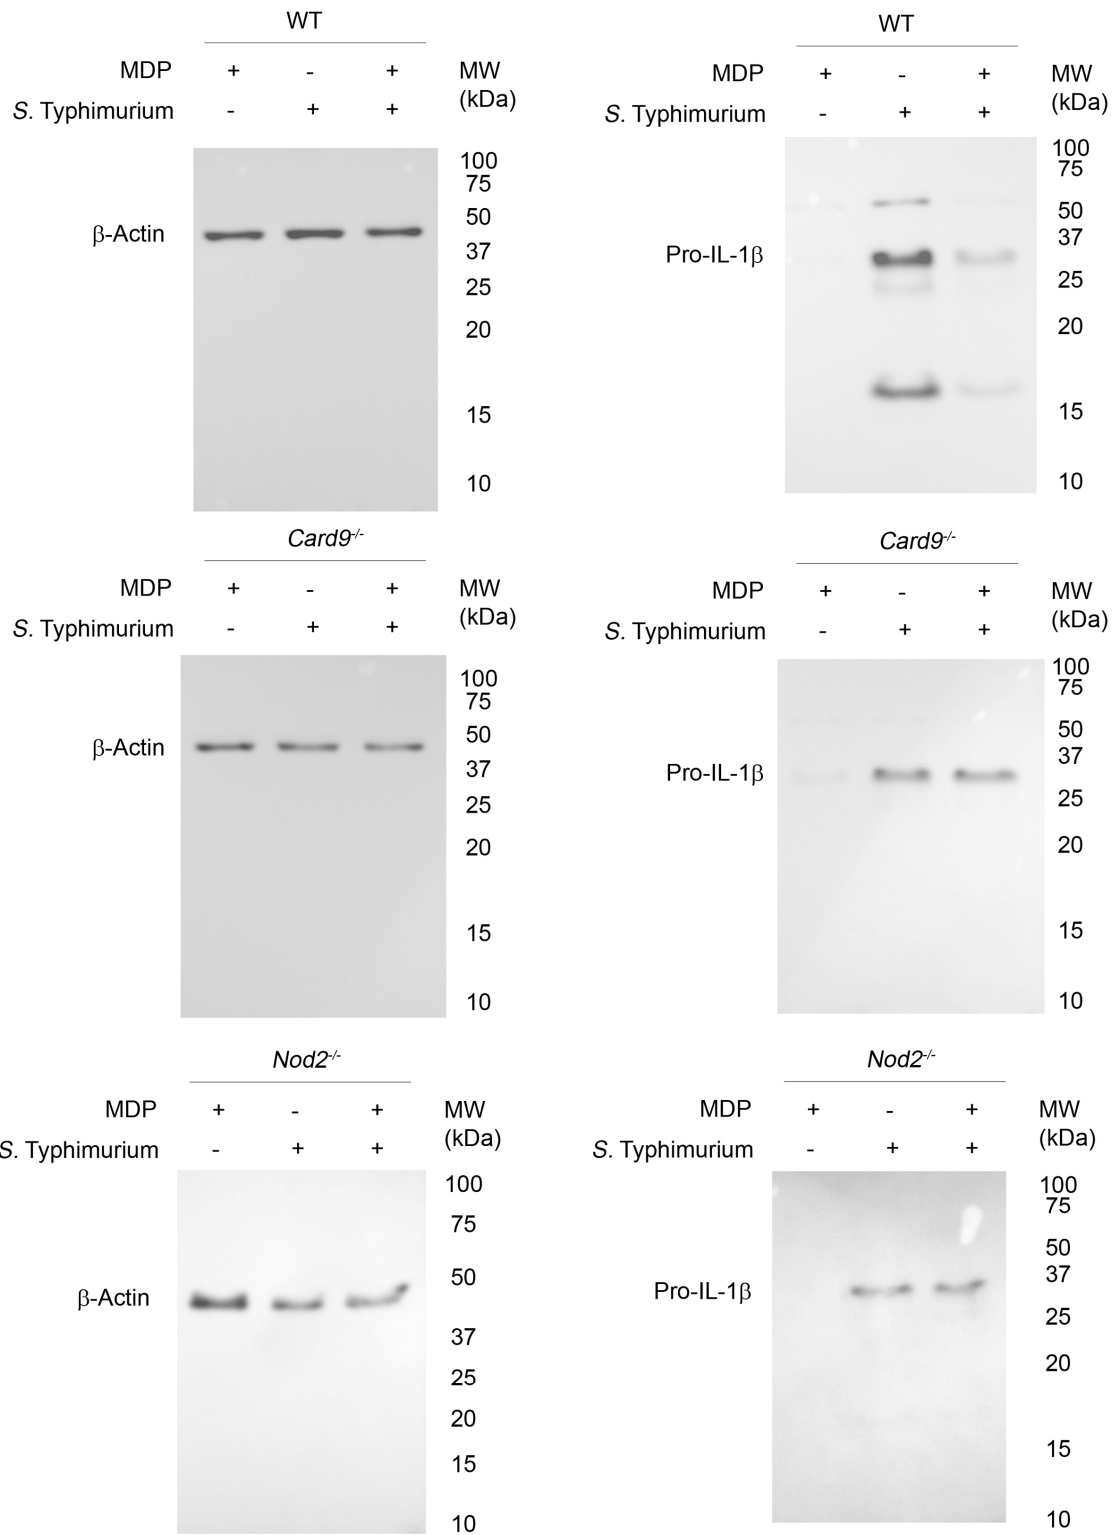

**Supplementary Figure 22: Uncropped immunoblots presented in Supplementary Figure 7.** Membranes were probed using the antibody indicated (β-Actin and Pro-IL-1β).

**Supplementary Table 1: Pairs of primers used for the qPCR experiments.**

| Gene             | Forward (5'-3')         | Reverse (5'-3')          | Amplicon size (bp) | Primer Bank ID |
|------------------|-------------------------|--------------------------|--------------------|----------------|
| $\beta$ -actin   | GGCTGTATCCCTCCATCG      | CCAGTTGGTAACAATGCCATGT   | 154                | 6671509a1      |
| ASC              | CTTGTCAGGGGATGAACCTAAAA | GCCATACCGACTCCAGATAGTAGC | 154                | 31560222a1     |
| Bcl-10           | CTTCAAGTAGAAAACGGGCTGG  | GCACCTAGAGAGGTTGTTGGT    | 233                | 6753166a1      |
| Caspase-1        | ACAAGGCACGGGACCTATG     | TCCCAGTCAGTCTGGAAATG     | 237                | 6753282a1      |
| Caspase-8        | TGCTTGGACTACATCCCACAC   | TGCAGTCTAGGAAGTTGACCA    | 169                | 33859520a1     |
| FADD             | GCGCCGACACGATCTACTG     | TTACCCGCTCACTCAGACTTC    | 215                | 6753812a1      |
| GAPDH            | AGGTCGGTGTGAACGGATTG    | TGTAGACCATGTAGTTGAGGTCA  | 123                | 6679937a1      |
| MALT-1           | GGACAAAGTCGCCCTTTTGAT   | TCCACAGCGTTACACATCTCA    | 165                | 27370250a1     |
| NAIP5            | TGCCAAACCTACAAGAGCTGA   | CAAGCGTTTAGACTGGGGATG    | 203                | 5932014a1      |
| NLRC4            | TTGAAGGCGAGTCTGGCAAAG   | GGCGTTCTCAGGTGGATG       | 125                | 146198620c2    |
| NLRP3            | ATTACCCGCCCGAGAAAGG     | TGCGAGCAAAGATCCACACAG    | 141                | 22003870a1     |
| Pro-IL-18        | GTGAACCCAGACCAGACTG     | CCTGGAACACGTTTCTGAAAGA   | 202                | 6680412c1      |
| Pro-IL-1 $\beta$ | TTCAGGCAGGCAGTATCACTC   | GAAGGTCCACGGGAAAGACAC    | 75                 | 118130747c2    |
| RANTES           | GCTGCTTGCCTACCTCTCC     | TCGAGTGACAAACACGACTGC    | 104                | 7305461a1      |
| SYK              | CTACCTGTACGCCAGAGC      | GCCATTAAGTTCCTCTCGATG    | 103                | 6755706a1      |
| TNF- $\alpha$    | CCCTCACACTCAGATCATCTTCT | GCTACGACGTGGGCTACAG      | 61                 | 7305585a1      |
